# Supplementary material
Source: Springer Nature journal article supplement (https://www.springermedizin.de/resource/supplementary/12885_2014_4623_MOESM1_ESM.pdf/9466848)
Supplement: MOESM1 [file 9466848]

**A**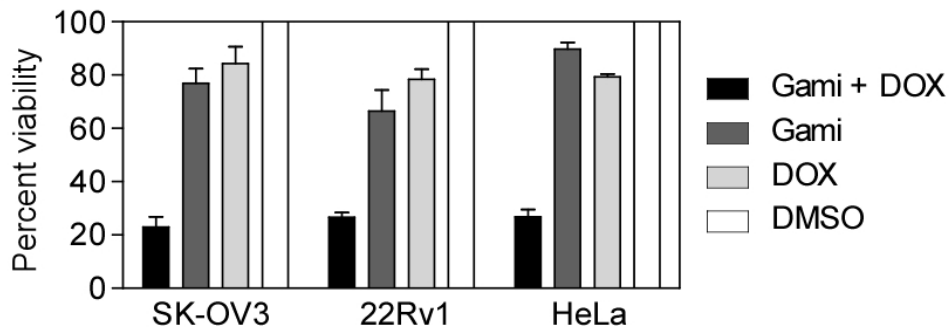**B**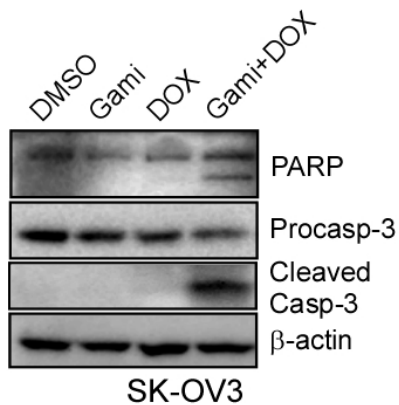**C**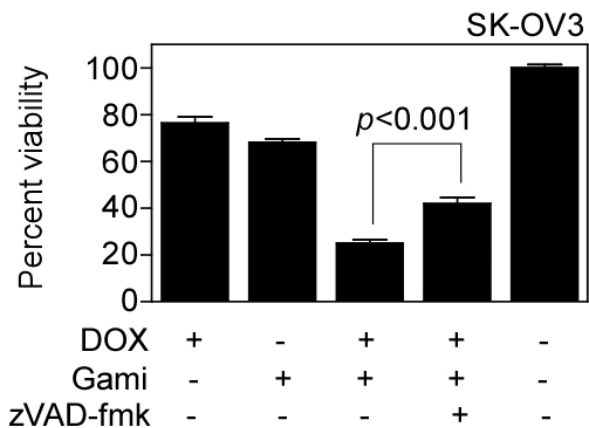

Supplementary Figure S1

**A**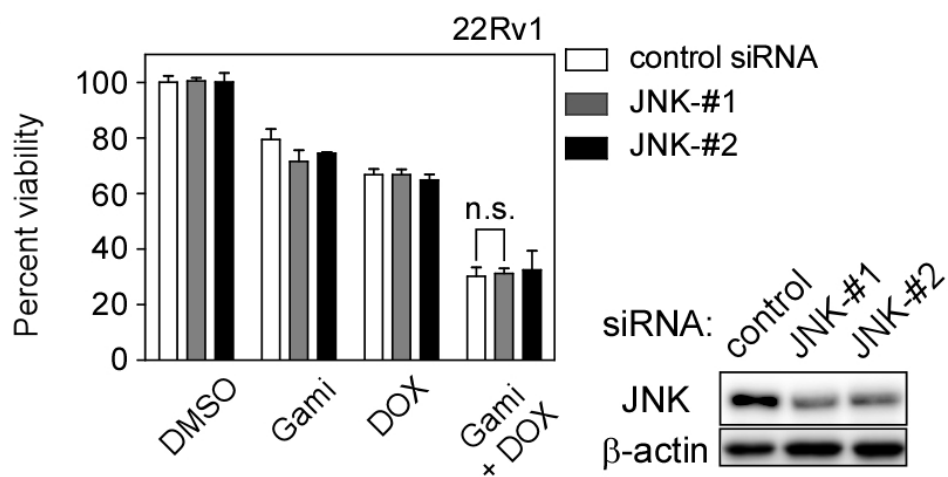**B**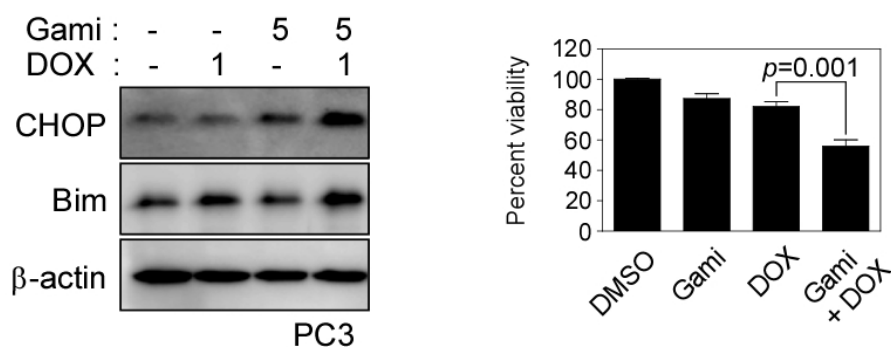**C**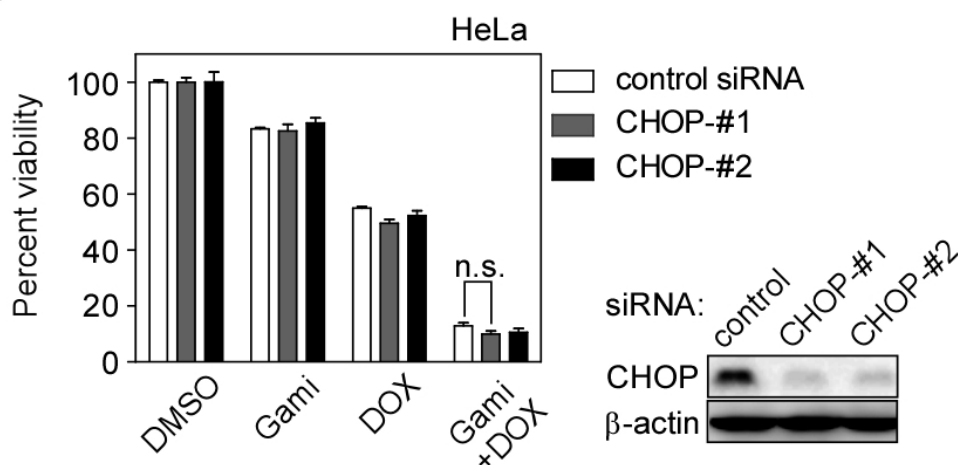

**A**

|        |   |   |   |   |   |   |   |   |
|--------|---|---|---|---|---|---|---|---|
| Gami:  | - | + | - | + | - | + | - | + |
| DOX:   | - | - | + | + | - | - | + | + |
| MG132: | - | - | - | - | + | + | + | + |

CHOP

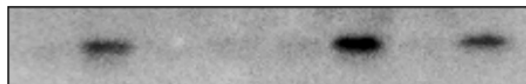

Bim

(long exposure)

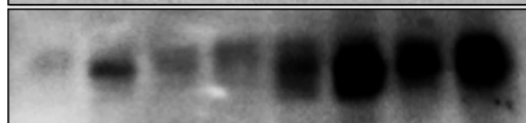

Bim

(short exposure)

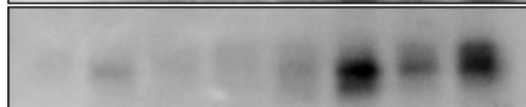 $\beta$ -actin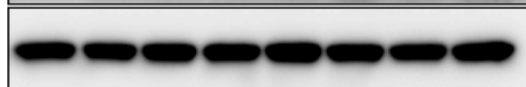

HeLa

**B**

|           |   |   |   |   |   |
|-----------|---|---|---|---|---|
| Gami :    | - | + | - | + | + |
| DOX :     | - | - | + | + | + |
| SP600125: | - | - | - | - | + |

p-JNK

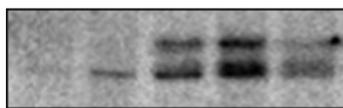

JNK

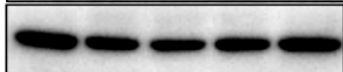 $\beta$ -actin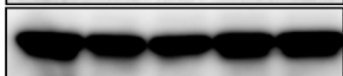

HeLa



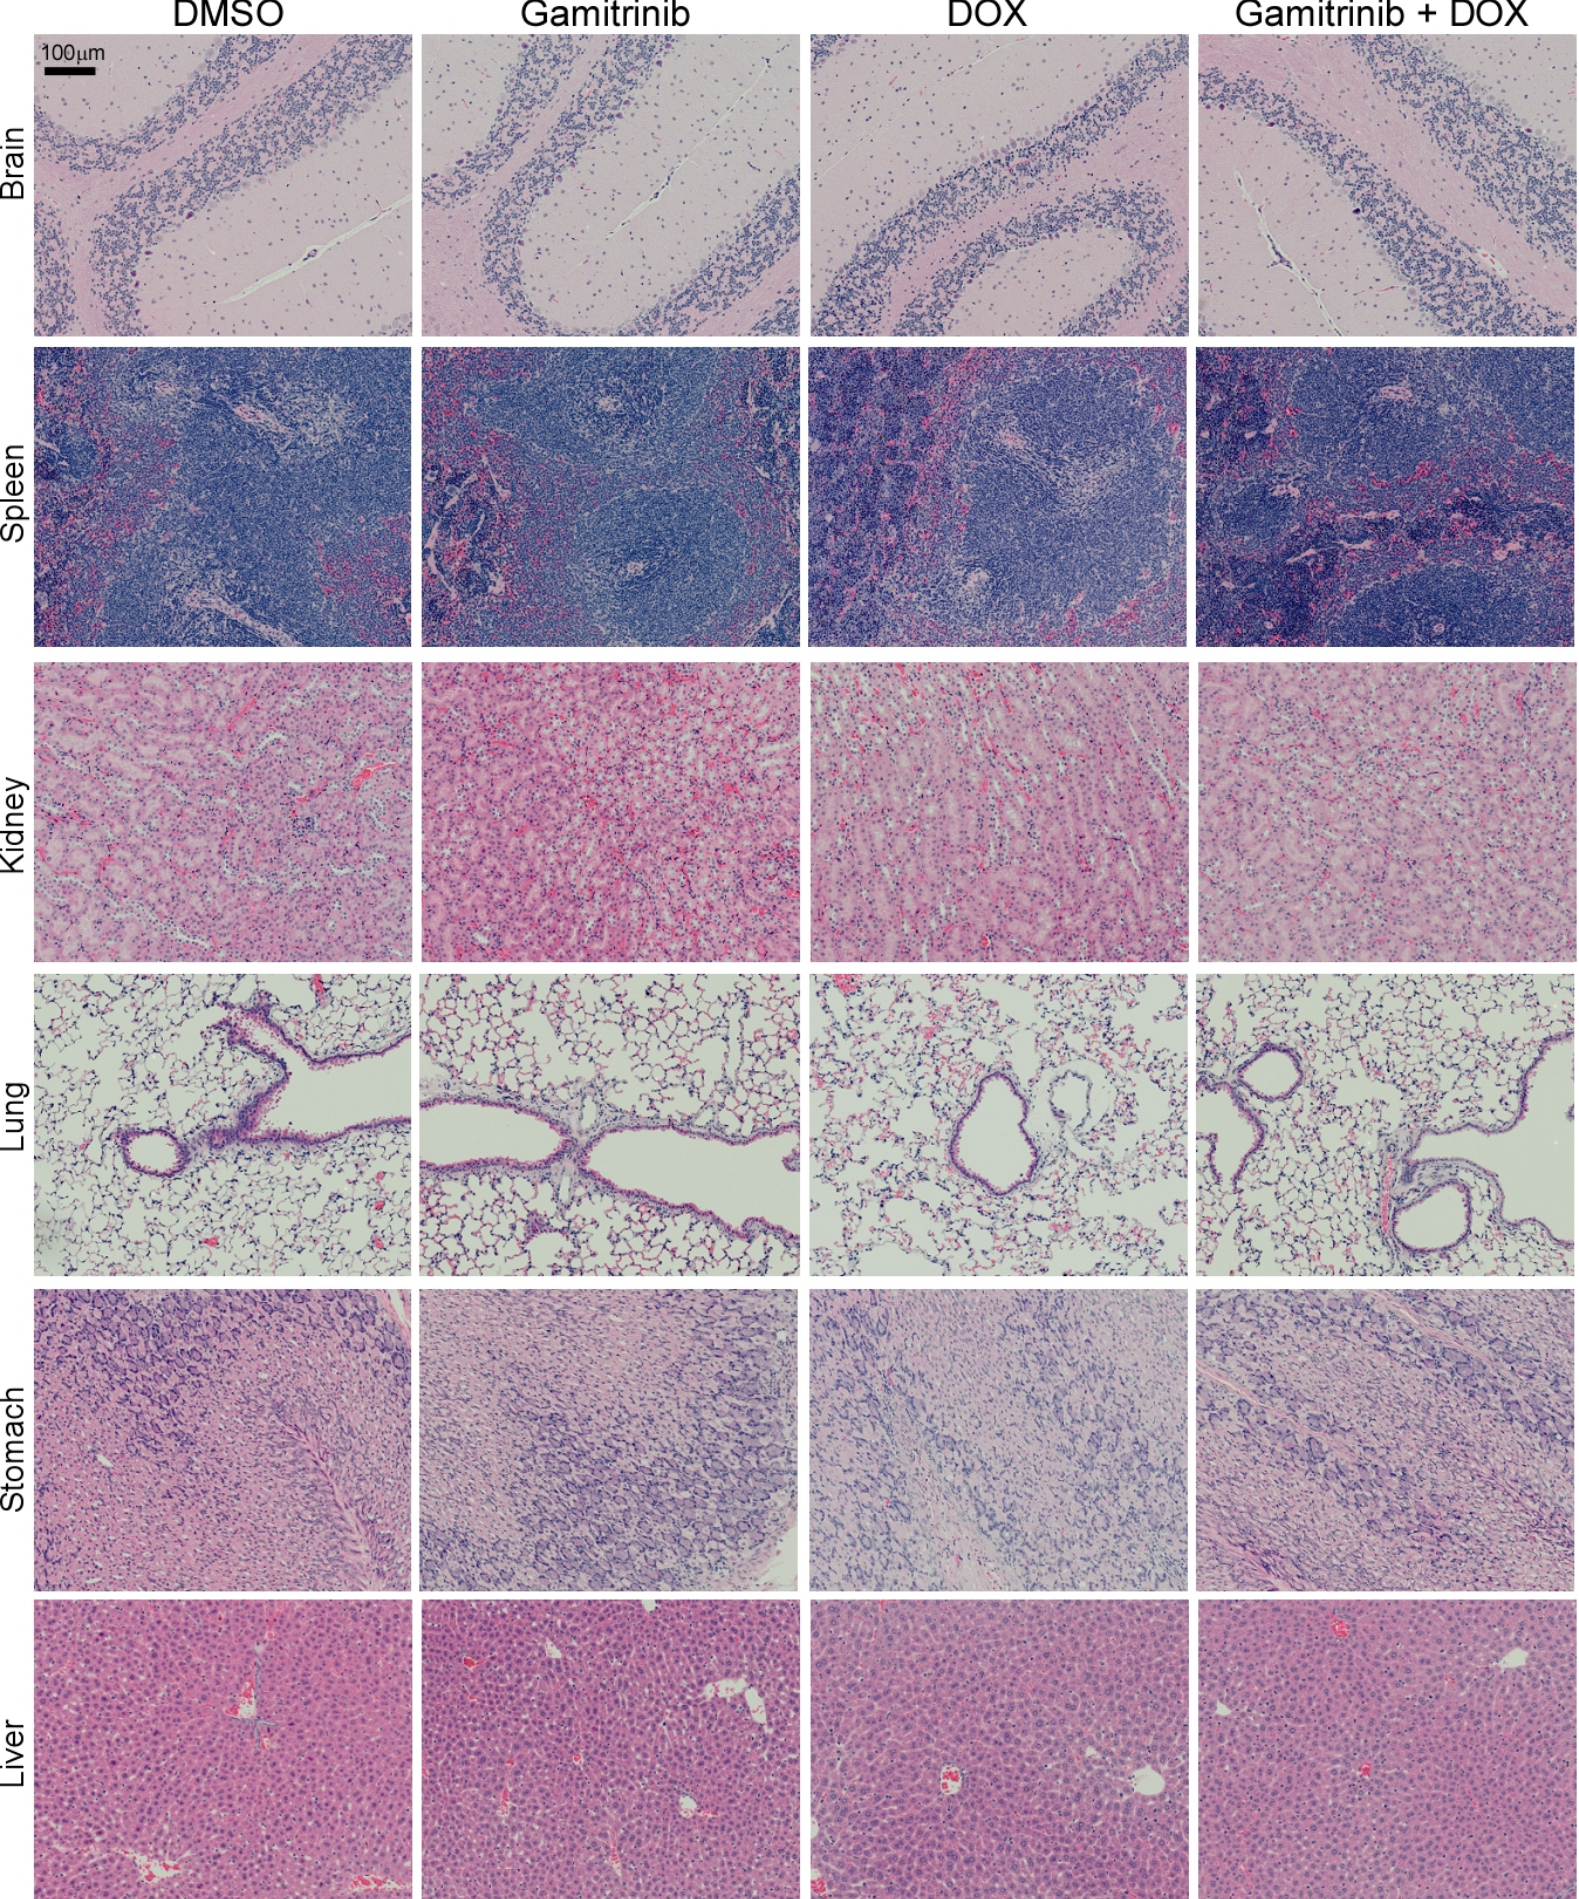

100µm

Brain

Spleen

Kidney

Lung

Stomach

Liver

Supplementary Figure S4
